# Supplementary material for: Hemodiafiltration Is Associated With Reduced Inflammation and Increased Bone Formation Compared With Conventional Hemodialysis in Children: The HDF, Hearts and Heights (3H) Study
Source: PubMed Central journal article supplement — Kidney Int Rep. 2021 Jul 6;6(9):2358–70. doi: 10.1016/j.ekir.2021.06.025 (PMC8418977; doi:10.1016/j.ekir.2021.06.025), 2021-07-06
Supplement: mmc1.pdf [file mmc1.pdf]

**Supplemental Figure 1** Flow chart of study populations, including the number of children who were screened, underwent randomization, and completed 1-year follow-up in the HD and HDF arms

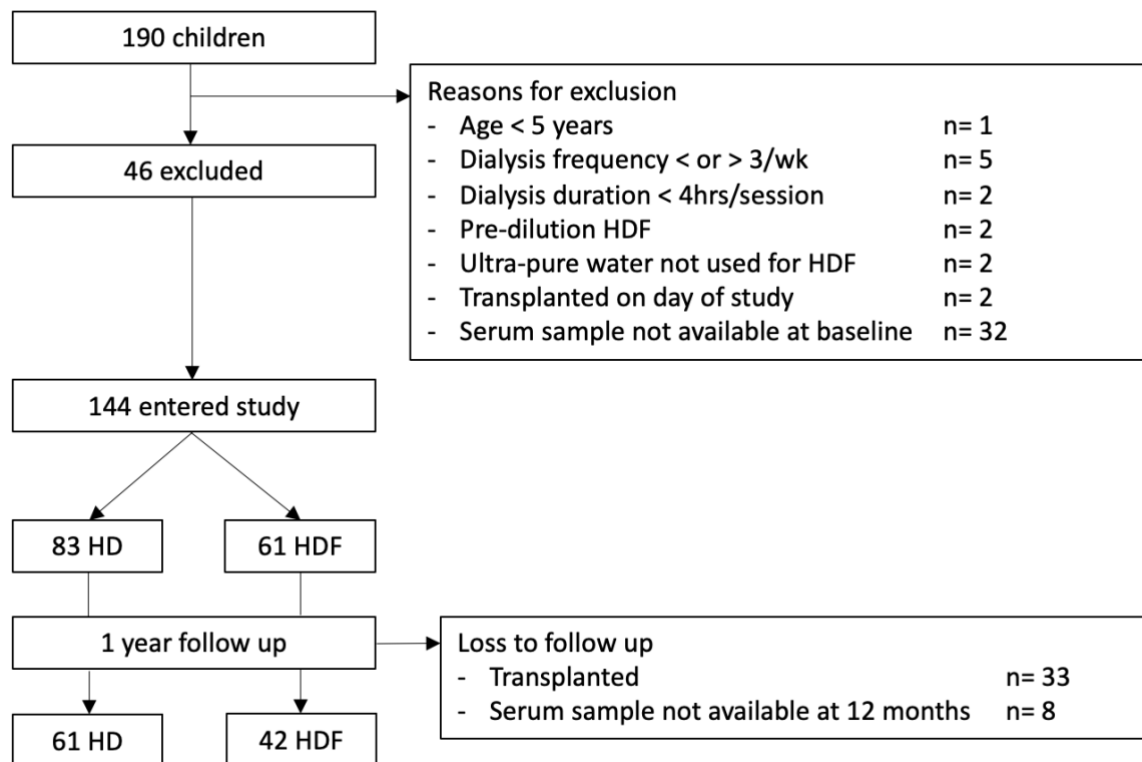

**Supplemental Table 1 Demographics of the study population at baseline**

|                                                          | <b>HD</b>                 | <b>HDF</b>                | <b>p</b>    |
|----------------------------------------------------------|---------------------------|---------------------------|-------------|
| <b>Number</b>                                            | 83                        | 61                        |             |
| <b>Age (years) n (%)</b>                                 |                           |                           | 0.65        |
| 5 - 10                                                   | 15 (18.1)                 | 14 (23.0)                 |             |
| 10-15                                                    | 28 (33.7)                 | 22 (36.1)                 |             |
| 15-20                                                    | 40 (48.2)                 | 25 (41.0)                 |             |
| <b>Females; n (%)</b>                                    | 36 (43.4)                 | 35 (57.4)                 | 0.10        |
| <b>Race (%)</b>                                          |                           |                           | 0.48        |
| Caucasian                                                | 60 (72.3)                 | 43 (70.5)                 |             |
| Asian                                                    | 8 (9.6)                   | 7 (11.5)                  |             |
| African                                                  | 5 (6.0)                   | 7 (11.5)                  |             |
| Mixed / Other                                            | 10 (12.1)                 | 4 (6.6)                   |             |
| <b>Underlying renal diagnosis (%)</b>                    |                           |                           | 0.94        |
| Cystic kidney disease                                    | 3 (3.6)                   | 3 (4.9)                   |             |
| Dysplasia                                                | 36 (43.4)                 | 24 (39.3)                 |             |
| Glomerulonephritis                                       | 17 (20.5)                 | 14 (23.0)                 |             |
| Others                                                   | 21 (25.3)                 | 17 (27.9)                 |             |
| Unknown                                                  | 6 (7.2)                   | 3 (4.9)                   |             |
| <b>Comorbidity/genetic conditions</b>                    |                           |                           |             |
| Impaired cognitive development                           | 17 (20.5)                 | 13 (21.3)                 | 0.90        |
| Impaired motor development                               | 7 (8.4)                   | 6 (9.8)                   | 0.77        |
| Ocular or hearing abnormalities                          | 3 (3.6)                   | 3 (4.9)                   | 0.70        |
| Cardio-pulmonary                                         | 3 (3.6)                   | 2 (3.3)                   | 0.91        |
| Genetic disorder/defined syndrome                        | 15 (18.1)                 | 15 (24.6)                 | 0.34        |
| <b>Previous dialysis</b>                                 |                           |                           |             |
| - Incident patients in study (%)                         | 57 (68.7)                 | 33 (54.1)                 | 0.07        |
| - Time on dialysis before 3H start                       | 1.2 (0.22 – 1.4)          | 1.12 (0.18 – 1.6)         | 0.76        |
| <b>If previous dialysis</b>                              |                           |                           |             |
| - PD / HD or HDF / HD and PD (%)                         | 57.7 / 23.1 / 19.2        | 46.4 / 39.3 / 14.3        | 0.44        |
| - Time on dialysis before 3H (months)                    | 25 (18 – 52)              | 30 (16 – 46)              | 0.80        |
| <b>Previous transplant</b>                               |                           |                           |             |
| - Yes (%)                                                | 13 (15.7)                 | 19 (31.2)                 | 0.03        |
| - time with functioning graft (months)                   | 35 (23 – 72)              | 72 (12 – 119)             | 0.84        |
| - immunosuppression continued (yes; %)                   | 11 (13.6)                 | 11 (18.0)                 | 0.43        |
| <b>Residual renal function (urine vol in ml/kg/day)</b>  | 2.70 (0 – 12.82)          | 4.27 (0 – 17.75)          | 0.37        |
| <b>Anthropometry</b>                                     |                           |                           |             |
| Height SDS                                               | -2.21 (-3.30 to -1.61)    | -1.41 (-2.67 to -0.51)    | 0.005       |
| Body mass index SDS                                      | -0.08 (-0.85 to 1.08)     | -0.36 (-1.03 to 0.40)     | 0.22        |
| <b>Medications</b>                                       |                           |                           |             |
| Native vitamin D (n; %)                                  | 32 (38.6)                 | 38 (60.3)                 | 0.005       |
| <b>Dosage (IU/day)</b>                                   | <b>2700 (0 – 8400)</b>    | <b>3120 (0 – 10,200)</b>  | <b>0.08</b> |
| Vitamin D analogs (n; %)                                 | 68 (81.9)                 | 53 (84.1)                 | 0.42        |
| <b>Dosage (mcg/day)</b>                                  | <b>0.32 (0.2 to 1.35)</b> | <b>0.30 (0.2 to 1.25)</b> | <b>0.61</b> |
| Phosphate binders:                                       |                           |                           | 0.71        |
| - none                                                   | 9 (10.8)                  | 6 (9.8)                   |             |
| - calcium based binders                                  | 47 (56.6)                 | 30 (49.2)                 |             |
| - Non-calcium based binders (sevelamer or lanthanum)     | 12 (14.5)                 | 13 (21.3)                 |             |
| - Both Ca based and non-Ca based binders                 | 15 (18.1)                 | 12 (19.7)                 |             |
| Calcium supplements (n; %)                               | 19 (22.9)                 | 14 (23.0)                 | 0.99        |
| Cinacalcet (n; %)                                        | 5 (6.0)                   | 5 (8.2)                   | 0.61        |
| Growth hormone (n; %)                                    | 11 (13.3)                 | 12 (19.7)                 | 0.30        |
| <b>Dialysis prescription</b>                             |                           |                           |             |
| <b>Dialysate calcium</b><br>1.25 vs 1.5 vs 1.75 mMol (%) | 63.9 / 30.1 / 6.0         | 78.7 / 19.7 / 1/6         | 0.12        |

|                                                               |                   |                   |      |
|---------------------------------------------------------------|-------------------|-------------------|------|
| <b>Dialysate bicarbonate</b><br><34 vs 34-36 vs >36mMol/L (%) | 47.0 / 45.8 / 7.2 | 45.9 / 47.5 / 6.6 | 0.97 |
|---------------------------------------------------------------|-------------------|-------------------|------|

Data are presented as number (n) with percentage or as median and interquartile range. All dialysis related parameters are expressed as the mean of the previous four mid-week dialysis sessions.

**Supplemental Table 2 Routine CKD mineral bone disease related measures at baseline and 12-months in the HD and HDF cohorts\***

|                                          | HD (n = 61)       |                    |      | HDF (n = 42)      |                   |      |
|------------------------------------------|-------------------|--------------------|------|-------------------|-------------------|------|
|                                          | Baseline          | 12 months          | p    | Baseline          | 12 months         | p    |
| Albumin-corrected serum calcium (mMol/L) | 2.4 (2.3, 2.5)    | 2.3 (2.2, 2.5)     | 0.63 | 2.5 (2.3, 2.6)    | 2.4 (2.3, 2.5)    | 0.71 |
| Serum phosphate (mMol/L)                 | 1.6 (1.3, 2.1)    | 1.7 (1.5, 2.1)     | 0.39 | 1.8 (1.3, 2.2)    | 1.8 (1.4, 2.0)    | 0.08 |
| Serum magnesium (mMol/L)                 | 1.0 (0.9, 1.2)    | 1.0 (0.9, 1.1)     | 0.82 | 1.0 (0.88, 1.2)   | 1.0 (0.94, 1.2)   | 0.77 |
| Serum alkaline phosphatase (IU/L)        | 187 (113, 294)    | 222 (124, 313)     | 0.20 | 166 (111, 242)    | 196 (148, 320)    | 0.06 |
| Serum parathyroid hormone (PTH; pMol/L)  | 32.6 (9.9 – 95.2) | 44.1 (11.2 – 91.7) | 0.27 | 29.8 (4.8 – 84.0) | 21.8 (3.7 – 69.7) | 0.08 |
| Serum 25-hydroxy vitamin D (nMol/L)      | 29 (19, 40)       | 31 (15, 42)        | 0.59 | 38 (27, 48)       | 35 (19, 52)       | 0.37 |
| Serum bicarbonate (mMol/L)               | 24 (18 – 26)      | 24 (17 – 25)       | 0.91 | 23 (19 – 24)      | 24 (18 – 26)      | 0.76 |

\*Patients with paired data at baseline and 12 months are shown  
Data are presented as median and interquartile range.

**Supplemental Table 3 Bone-specific biomarkers at baseline and 12-months in the HD and HDF cohorts\***

|                                                                   | HD                 |                     | HDF                |                   |
|-------------------------------------------------------------------|--------------------|---------------------|--------------------|-------------------|
|                                                                   | Baseline           | 12 months           | Baseline           | 12 months         |
| <b>Bone-specific alkaline phosphatase BAP; (IU/L)</b>             | 75 (32 – 96)       | 58 (49 - 73)        | 83 (34 – 102)      | 117 (69 – 138)    |
| <b>z-score</b>                                                    | 0.47 (-0.72, 2.10) | -1.50 (-2.80, 0.44) | 0.07 (-1.00, 0.91) | 1.40 (0.34, 2.50) |
| <b>Tartrate-resistant acid phosphatase 5b TRAP-5b; (IU/L)</b>     | 10.4 (0.9 – 14.2)  | 16.9 (7.8 – 21.1)   | 11.3 (6.8 – 19.0)  | 9.1 (4.6 – 13.9)  |
| <b>z-score</b>                                                    | 0.9 (-0.67, 1.9)   | 2.3 (0.84, 3.5)     | 0.64 (-0.46, 2)    | 0.17 (-0.84, 1.3) |
| <b>Sclerostin (ng/ml)</b>                                         | 0.92 (0.6, 1.5)    | 1.2 (0.68, 1.6)     | 0.72 (0.49, 0.97)  | 0.86 (0.57, 1.1)  |
| <b>Cross-linked C-telopeptide of type I collagen (CTX; ng/ml)</b> | 8.6 (5.6, 13)      | 9.4 (6, 14)         | 7.6 (4.7, 14)      | 8.9 (4.9, 12)     |
| <b>Intact FGF-23 (pg/ml)</b>                                      | 487 (166, 1210)    | 1540 (522, 3489)    | 588 (235, 1345)    | 417 (146, 1300)   |
| <b>Klotho (pg/ml)</b>                                             | 1225 (809, 1780)   | 1100 (697, 1760)    | 1420 (842, 2160)   | 1405 (868, 1903)  |
| <b>Inflammatory markers</b>                                       |                    |                     |                    |                   |
| <b>High-sensitivity CRP (g/L)</b>                                 | 2.3 (0.7, 5.9)     | 4.0 (1.5, 8.5)      | 0.9 (0.4, 2.6)     | 1.1 (0.4, 2.8)    |
| <b>Interleukin-6 (IL-6; pg/ml)</b>                                | 315 (165, 600)     | 600 (295, 784)      | 28 (5, 146)        | 24 (5, 98)        |
| <b>Tumor Necrosis Factor (TNF)-α (pg/ml)</b>                      | 303 (165, 919)     | 647 (315, 1000)     | 15 (8.5, 74)       | 12 (8, 37)        |
| <b>Fetuin-A (g/L)</b>                                             | 0.32 (0.26, 0.38)  | 0.32 (0.26, 0.42)   | 0.57 (0.44, 0.63)  | 0.53 (0.43, 0.63) |

\*The number of patients for each biomarker at each time point are shown on the respective Figures. Data are presented as median and interquartile range. All correlations are shown in the respective figures.

**Supplemental Table 4 – Factors associated with height SDS at 12-month follow-up**

|                                                    | Unadjusted |              |      | Adjusted 1 |              |      | Adjusted 2* – including mediators |             |      |
|----------------------------------------------------|------------|--------------|------|------------|--------------|------|-----------------------------------|-------------|------|
|                                                    | Beta       | 95% CI       | P    | Beta       | 95% CI       | P    | Beta                              | 95% CI      | P    |
| Dialysis modality (HD vs HDF)                      | -0.25      | -0.46, -0.03 | 0.02 | -0.24      | -0.46, -0.01 | 0.04 | -0.20                             | -0.42, 0.03 | 0.08 |
| Dialysis vintage (per year longer)                 | 0.01       | -0.04, 0.06  | 0.58 |            |              |      |                                   |             |      |
| Weight adjusted urine output (per 10 higher)       | 0.06       | -0.01, 0.13  | 0.10 | 0.05       | -0.02, 0.12  | 0.16 | 0.05                              | -0.02, 0.12 | 0.16 |
| Growth hormone medication (Yes vs no)              | -0.08      | -0.35, 0.19  | 0.57 |            |              |      |                                   |             |      |
| Physical activity (ref=3)                          |            |              | 0.20 |            |              |      |                                   |             |      |
| 1                                                  | -0.44      | -0.75, -0.14 |      |            |              |      |                                   |             |      |
| 2                                                  | -0.18      | -0.45, 0.10  |      |            |              |      |                                   |             |      |
| Impaired motor development (Yes vs no)             | 0.02       | -0.37, 0.41  | 0.93 |            |              |      |                                   |             |      |
| <b>Potential mediators measured at one year:</b>   |            |              |      |            |              |      |                                   |             |      |
| Beta-2 microglobulin (per 10 higher)               | -0.04      | -0.11, 0.04  | 0.33 |            |              |      |                                   |             |      |
| IL-6 (Per 100 higher)                              | -0.01      | -0.03, 0.01  | 0.35 |            |              |      |                                   |             |      |
| TNF- $\alpha$ (Per 100 higher)                     | -0.01      | -0.03, 0.02  | 0.70 |            |              |      |                                   |             |      |
| hs-CRP (per 10 higher)                             | 0.03       | -0.05, 0.12  | 0.40 |            |              |      |                                   |             |      |
| Calcium                                            | 0.36       | -0.16, 0.88  | 0.18 |            |              |      |                                   |             |      |
| Phosphate                                          | -0.19      | -0.38, 0.01  | 0.06 |            |              |      | -0.18                             | -0.39, 0.03 | 0.10 |
| Vitamin D level (per 10 higher)                    | 0.02       | -0.03, 0.07  | 0.46 |            |              |      |                                   |             |      |
| Convective volume adjusted for BSA (Per 10 higher) | -0.08      | -0.27, 0.11  | 0.43 |            |              |      |                                   |             |      |

All independent variables measured at baseline. Results from linear regression models, additionally adjusted for baseline height and country. 95% CI = 95% confidence interval; BSA=body surface area.

Adjusted model 1: Adjusted for all potential confounders for the association between dialysis modality and bone disease with p<0.2 in univariable analyses n=118;

Adjusted model 2: Adjusted for all potential confounders, plus potential mediators measured at 12 months with p<0.2 in univariable analyses. n=117

**STROBE Checklist - Hemodiafiltration is associated with reduced inflammation and increased bone turnover compared to conventional hemodialysis in children**  
**- the HDF, Heart and Height (3H) study**

|                              | Item No | Recommendation                                                                                                                                                                                                                                                                                                                         | Page No    |
|------------------------------|---------|----------------------------------------------------------------------------------------------------------------------------------------------------------------------------------------------------------------------------------------------------------------------------------------------------------------------------------------|------------|
| <b>Title and abstract</b>    | 1       | (a) Indicate the study's design with a commonly used term in the title or the abstract<br><br>(b) Provide in the abstract an informative and balanced summary of what was done and what was found                                                                                                                                      | 1<br><br>3 |
| <b>Introduction</b>          |         |                                                                                                                                                                                                                                                                                                                                        |            |
| Background/rationale         | 2       | Explain the scientific background and rationale for the investigation being reported                                                                                                                                                                                                                                                   | 4          |
| Objectives                   | 3       | State specific objectives, including any prespecified hypotheses                                                                                                                                                                                                                                                                       | 4-5        |
| <b>Methods</b>               |         |                                                                                                                                                                                                                                                                                                                                        |            |
| Study design                 | 4       | Present key elements of study design early in the paper                                                                                                                                                                                                                                                                                | 5          |
| Setting                      | 5       | Describe the setting, locations, and relevant dates, including periods of recruitment, exposure, follow-up, and data collection                                                                                                                                                                                                        | 5          |
| Participants                 | 6       | (a) Give the eligibility criteria, and the sources and methods of selection of participants. Describe methods of follow-up<br><br>(b) For matched studies, give matching criteria and number of exposed and unexposed                                                                                                                  | 5          |
| Variables                    | 7       | Clearly define all outcomes, exposures, predictors, potential confounders, and effect modifiers. Give diagnostic criteria, if applicable                                                                                                                                                                                               | 6          |
| Data sources/<br>measurement | 8*      | For each variable of interest, give sources of data and details of methods of assessment (measurement). Describe comparability of assessment methods if there is more than one group                                                                                                                                                   | 6          |
| Bias                         | 9       | Describe any efforts to address potential sources of bias                                                                                                                                                                                                                                                                              | 5-6        |
| Study size                   | 10      | Explain how the study size was arrived at                                                                                                                                                                                                                                                                                              | 5          |
| Quantitative variables       | 11      | Explain how quantitative variables were handled in the analyses. If applicable, describe which groupings were chosen and why                                                                                                                                                                                                           | 6          |
| Statistical methods          | 12      | (a) Describe all statistical methods, including those used to control for confounding<br><br>(b) Describe any methods used to examine subgroups and interactions<br><br>(c) Explain how missing data were addressed<br><br>(d) If applicable, explain how loss to follow-up was addressed<br><br>(e) Describe any sensitivity analyses | 6-7        |
| <b>Results</b>               |         |                                                                                                                                                                                                                                                                                                                                        |            |
| Participants                 | 13*     | (a) Report numbers of individuals at each stage of study—eg numbers potentially eligible, examined for eligibility, confirmed eligible, included in the study, completing follow-up, and analysed<br><br>(b) Give reasons for non-participation at each stage<br><br>(c) Consider use of a flow diagram                                | 7-8        |
| Descriptive data             | 14*     | (a) Give characteristics of study participants (eg demographic, clinical, social) and information on exposures and potential confounders<br><br>(b) Indicate number of participants with missing data for each variable of interest                                                                                                    | 7-8        |

| (c) Summarise follow-up time (eg, average and total amount) |     |                                                                                                                                                                                                                                                                                                                                                                                                               |         |
|-------------------------------------------------------------|-----|---------------------------------------------------------------------------------------------------------------------------------------------------------------------------------------------------------------------------------------------------------------------------------------------------------------------------------------------------------------------------------------------------------------|---------|
| Outcome data                                                | 15* | Report numbers of outcome events or summary measures over time                                                                                                                                                                                                                                                                                                                                                | 7-8     |
| Main results                                                | 16  | (a) Give unadjusted estimates and, if applicable, confounder-adjusted estimates and their precision (eg, 95% confidence interval). Make clear which confounders were adjusted for and why they were included<br>(b) Report category boundaries when continuous variables were categorized<br>(c) If relevant, consider translating estimates of relative risk into absolute risk for a meaningful time period | 8 -9-10 |
| Other analyses                                              | 17  | Report other analyses done—eg analyses of subgroups and interactions, and sensitivity analyses                                                                                                                                                                                                                                                                                                                | 9 -10   |
| <b>Discussion</b>                                           |     |                                                                                                                                                                                                                                                                                                                                                                                                               |         |
| Key results                                                 | 18  | Summarise key results with reference to study objectives                                                                                                                                                                                                                                                                                                                                                      | 10 -11  |
| Limitations                                                 | 19  | Discuss limitations of the study, taking into account sources of potential bias or imprecision. Discuss both direction and magnitude of any potential bias                                                                                                                                                                                                                                                    | 14      |
| Interpretation                                              | 20  | Give a cautious overall interpretation of results considering objectives, limitations, multiplicity of analyses, results from similar studies, and other relevant evidence                                                                                                                                                                                                                                    | 14      |
| Generalisability                                            | 21  | Discuss the generalisability (external validity) of the study results                                                                                                                                                                                                                                                                                                                                         | 14      |
| <b>Other information</b>                                    |     |                                                                                                                                                                                                                                                                                                                                                                                                               |         |
| Funding                                                     | 22  | Give the source of funding and the role of the funders for the present study and, if applicable, for the original study on which the present article is based                                                                                                                                                                                                                                                 | 16      |

\*Give information separately for exposed and unexposed groups.

**Note:** An Explanation and Elaboration article discusses each checklist item and gives methodological background and published examples of transparent reporting. The STROBE checklist is best used in conjunction with this article (freely available on the Web sites of PLoS Medicine at <http://www.plosmedicine.org/>, Annals of Internal Medicine at <http://www.annals.org/>, and Epidemiology at <http://www.epidem.com/>). Information on the STROBE Initiative is available at <http://www.strobe-statement.org>.
